# Supplementary material for: Mechanoenzymatic reactions with whole cell transaminases: shaken, not stirred
Source: Royal Society of Chemistry journal article supplement (doi:10.1039/d2gc01006b), 2022-01-01
Supplement: d2gc01006b2.xlsx [file d2gc01006b2.xlsx]

## Sheet: 2
Mostly 210		Results					1C amine	3334
	Alanine		Area 1	Area 2	Avg. Area	Amine (mM)	Amine (dilution)	% Yield
A	1 equiv.	100 µL	2872	1821	2346.5	0.703809	1.40762	14.0762
				s.d.	525.5	0.157618	0.315237	3.15237
D	1 equiv.	500 µL	3077	3326	3201.5	0.960258	1.92052	19.2052
				s.d.	124.5	0.0373425	0.0746851	0.746851
G	1 equiv.	1000 µL	4127	4243	4185	1.25525	2.5105	25.105
				s.d.	58	0.0173965	0.034793	0.34793
B	2 equiv.	100 µL	1949	3224	2586.5	0.775795	1.55159	15.5159
				s.d.	637.5	0.191212	0.382424	3.82424
E	2 equiv.	500 µL	5419	3688	4553.5	1.36578	2.73155	27.3155
				s.d.	865.5	0.259598	0.519196	5.19196
H	2 equiv.	1000 µL	5533	10467	5533	1.65957	3.31914	33.1914
				s.d.	0	0	0	5
C	4 equiv.	100 µL	4346	-	4346	1.30354	2.60708	26.0708
				s.d.	0	0	0	0
F	4 equiv.	500 µL	6313	6315	6314	1.89382	3.78764	37.8764
				s.d.	1	0.00029994	0.00059988	0.0059988
I	4 equiv.	1000 µL	7764	6848	7306	2.19136	4.38272	43.8272
				s.d.	458	0.137373	0.274745	2.74745
212	4 equiv.	1000 µL	6953	7263	7108	2.13197	4.26395	42.6395
				s.d.	155	0.0464907	0.0929814	0.929814
211	4 equiv.	1500 µL	6807	7190	6998.5	2.09913	4.19826	41.9826
				s.d.	191.5	0.0574385	0.114877	1.14877
212	6 equiv.	1000 µL	7241	7859	7550	2.26455	4.52909	45.2909
				s.d.	309	0.0926815	0.185363	1.85363
211	6 equiv.	1500 µL	6633	7304	6968.5	2.09013	4.18026	41.8026
				s.d.	335.5	0.10063	0.20126	2.0126
216	6 equiv.	2000 µL	7461	4840	6150.5	1.84478	3.68956	36.8956
				s.d.	1310.5	0.393071	0.786143	5
212	8 equiv.	1000 µL	8335	8618	8476.5	2.54244	5.08488	50.8488
				s.d.	141.5	0.0424415	0.084883	0.84883
211	8 equiv.	1500 µL	8287	8654	8470.5	2.54064	5.08128	50.8128
				s.d.	183.5	0.055039	0.110078	1.10078
216	8 equiv.	2000 µL	7606	7254	7430	2.22855	4.45711	44.5711
				s.d.	176	0.0527894	0.105579	1.05579
	MBA		Area 1	Area 2	Avg. Area	Amine (mM)	Amine (dilution)	% Yield
S	1 equiv.	100 µL	1362	1580	1471	0.441212	0.882424	8.82424
				s.d.	109	0.0326935	0.0653869	0.653869
V	1 equiv.	500 µL	6289	6024	6156.5	1.84658	3.69316	36.9316
				s.d.	132.5	0.0397421	0.0794841	0.794841
216	1 equiv.	1000 µL	9243	9144	9193.5	2.7575	5.515	55.15
				s.d.	49.5	0.014847	0.0296941	0.296941
216	1 equiv.	1500 µL	10494	8457	9475.5	2.84208	5.68416	56.8416
				s.d.	1018.5	0.305489	0.610978	6.10978
216	1 equiv.	2000 µL	5238	7656	6447	1.93371	3.86743	38.6743
				s.d.	1209	0.362627	0.725255	7.25255
T	2 equiv.	100 µL	1618	1106	1362	0.408518	0.817037	8.17037
				s.d.	256	0.0767846	0.153569	1.53569
W	2 equiv.	500 µL	5570	5398	5484	1.64487	3.28974	32.8974
				s.d.	86	0.0257948	0.0515897	0.515897
205/210	2 equiv.	1000 µL	9277	5934	7605.5	2.28119	4.56239	45.6239
				s.d.	1671.5	0.50135	1.0027	5
U	4 equiv.	100 µL	943	1034	988.5	0.296491	0.592981	5.92981
				s.d.	45.5	0.0136473	0.0272945	0.272945
X	4 equiv.	500 µL	3989	4036	4012.5	1.20351	2.40702	24.0702
				s.d.	23.5	0.00704859	0.0140972	0.140972
AA	4 equiv.	1000 µL	4733	5203	4968	1.4901	2.9802	29.802
				s.d.	235	0.0704859	0.140972	1.40972
	IPA.HCl		Area 1	Area 2	Avg. Area	Amine (mM)	Amine (dilution)	% Yield
215	10 equiv.	100 µL	277	182	229.5	0.0688362	0.137672	1.37672
				s.d.	47.5	0.0142472	0.0284943	0.284943
215	10 equiv.	500 µL	1913	1993	1953	0.585783	1.17157	11.7157
				s.d.	40	0.0119976	0.0239952	0.239952
215	10 equiv.	1000 µL	1134	1312	1223	0.366827	0.733653	7.33653
				s.d.	89	0.0266947	0.0533893	0.533893
215	20 equiv.	100 µL	284	313	298.5	0.0895321	0.179064	1.79064
				s.d.	14.5	0.00434913	0.00869826	0.0869826
215	20 equiv.	500 µL	3129	2605	2867	0.859928	1.71986	17.1986
				s.d.	262	0.0785843	0.157169	1.57169
215	20 equiv.	1000 µL	2506	2495	2500.5	0.75	1.5	15
				s.d.	5.5	0.00164967	0.00329934	0.0329934
215	50 equiv.	100 µL	132	283	207.5	0.0622376	0.124475	1.24475
				s.d.	75.5	0.0226455	0.0452909	0.452909
215	50 equiv.	500 µL	6456	4608	5532	1.65927	3.31854	33.1854
				s.d.	924	0.277145	0.554289	5.54289
215	50 equiv.	1000 µL	6604	8848	7726	2.31734	4.63467	46.3467
				s.d.	1122	0.336533	0.673065	6.73065
217	50 equiv.	1500 µL	5239	-	5239	1.57139	3.14277	31.4277
				s.d.	0	0	0	0
217	75 equiv.	1000 µL	12145	13954	13049.5	3.91407	7.82813	78.2813
				s.d.	904.5	0.271296	0.542591	5.42591
217	75 equiv.	1500 µL	11573	3486	11573	3.47121	6.94241	69.4241
				s.d.	-	#VALUE!	#VALUE!	5
217	100 equiv.	1000 µL	10699	13249	11974	3.59148	7.18296	71.8296
				s.d.	1275	0.382424	0.764847	7.64847
217	100 equiv.	1500 µL	9898	11753	10825.5	3.247	6.494	64.94
				s.d.	927.5	0.278194	0.556389	5.56389

## Sheet: 3&4
	EC299	Ball mill, whole cell	SD	100 mM, ball mill, whole cell	SD	No milling, whole cell	SD	No milling, clarified lysate	SD
A	1b	96	1.69967	93	3	20.2447	0.102418	78.9986	4.35846
B	2b	84	2.86744	88	1	17.235	2.98751	68.8763	5.96647
C	3b	77	6.01849	89	2.49444	12.9918	4.88744	40.2741	6.15987
D	4b	98	0.5	92	3	29.9327	7.0673	57.3658	0.915001
E	5b	89	7.31817	88	5.47723	19.6375	2.93656	36.7251	7.67372
G	6b	96	3	94	1.5	71	5	93.3333	4.6428
F	7b	63	2	43	3	7.01523	1.02296	26.6242	2.51875
H	8b	79	1.24722	54	2	14.2278	3.99573	32.43	5.63884
I	9b	90	3.85861	97	3.09121	27.1575	3.84254	37.9558	2.12707
J	10b	78	5.4365	75	1	21.9497	0.356394	36.499	1.2369
K	11b	58	3.09121	58	3	24.7207	3.27928	40.5766	4.57658
L	12b	74	3	33	3	3		5
	50 mM, ball mill, whole cell
	100 mM, ball mill, whole cell
